# Supplementary material for: Hyaluronic acid-conjugated mesoporous silica nanoparticles: excellent colloidal dispersity in physiological fluids and targeting efficacy
Source: Royal Society of Chemistry journal article supplement (doi:10.1039/c2jm15489g), 2012-01-01
Supplement: c2jm15489g.pdf [file c2jm15489g.pdf]

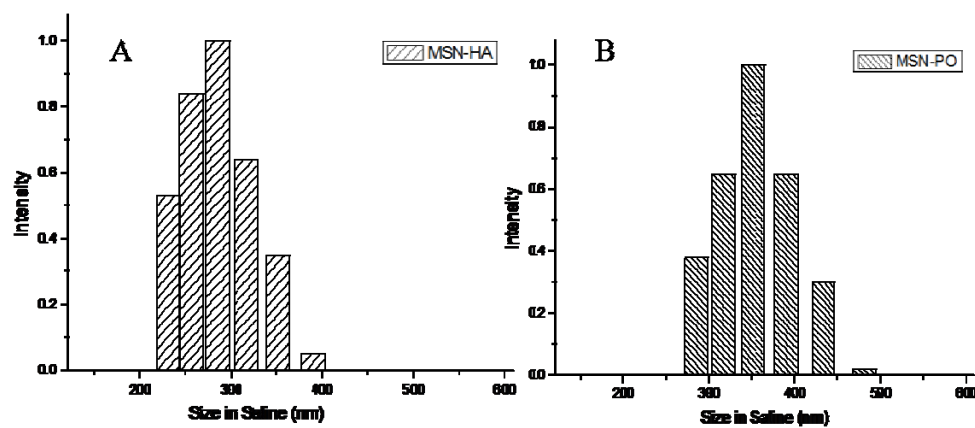

Fig. S1. Particle size distributions of MSNs-HA (A) and MSNs-PO (B) in saline solutions.

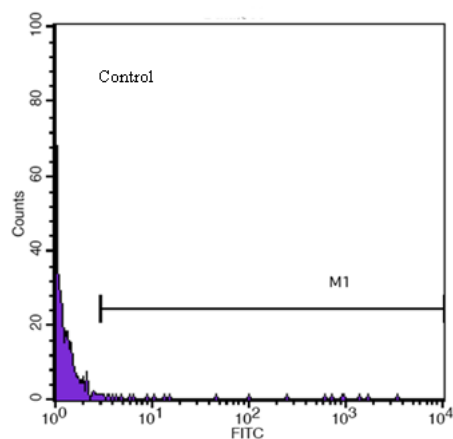

Fig. S2. Blank control group of the cytometric analysis.

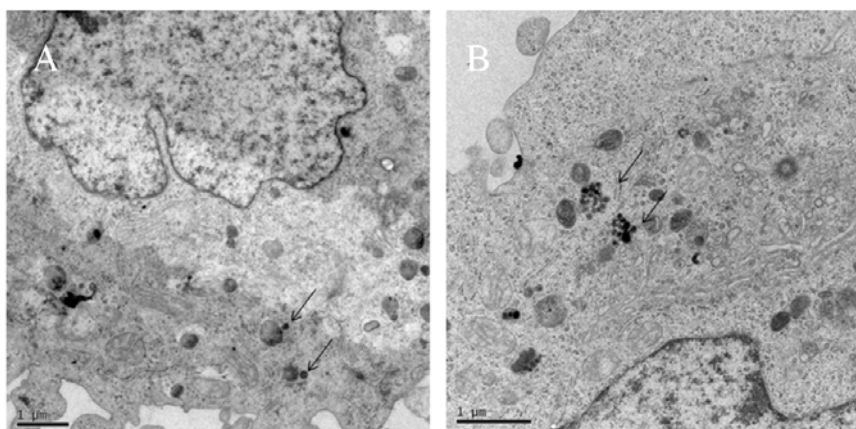

Fig. S3. Both A and B are the representative images demonstrating the locations of MSNs-HA in Hela cells after co-incubation for 3 h. The arrows show the location of MSNs-HA in cytosols.

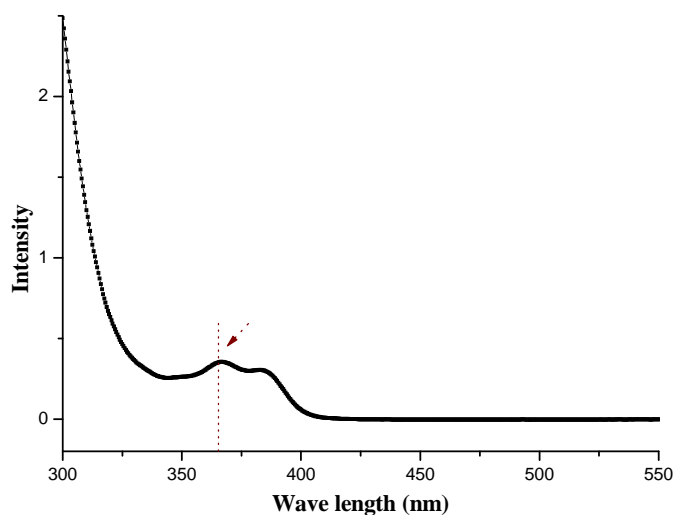

Fig. S4. UV-vis spectrum for measuring the CPT loading capacity in MSNs-NH<sub>2</sub>. 5 mg of dried CPT loaded MSNs-HA were sonicated in 10 mL of DMSO to release the CPT drug from the mesopores. The CPT drug concentrations were determined using the UV-visible absorption spectrum.

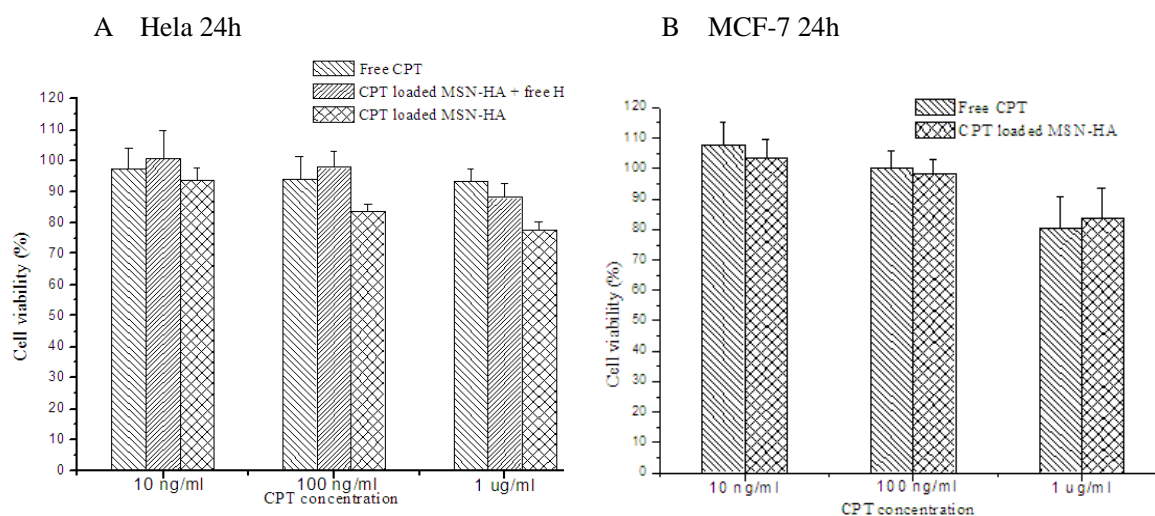

Fig. S5. (A) Viabilities of HeLa cells incubated with free CPT, CPT-loaded MSNs-HA and CPT-loaded MSNs-HA in the presence of excess free HA for 24 h. (B) Viabilities of MCF-7 cells incubated with free CPT and CPT-loaded MSNs-HA for 24 h. The cell viabilities exhibited no dramatic decrease in the first 24 h because of the low solubility, low loading amount and release rate of the hydrophobic drug from mesopores.
